# Supplementary material for: Morphology-controlled synthesis of Ag3PO4 microcrystals for high performance photocatalysis
Source: Royal Society of Chemistry journal article supplement (doi:10.1039/c3ce40172c), 2013-01-01
Supplement: c3ce40172c.pdf [file c3ce40172c.pdf]

*Electronic supplementary information*

## Morphology-controlled synthesis of $\text{Ag}_3\text{PO}_4$ microcrystals for high performance photocatalysis

Yang-Sen Xu, Wei-De Zhang\*

School of Chemistry and Chemical Engineering, South China University of  
Technology, 381 Wushan Road, Guangzhou 510640, People's Republic of China

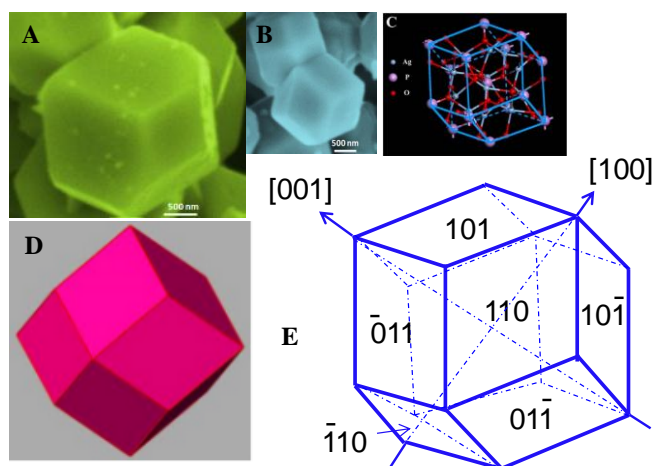

Fig. S1 (A, B) the obtained  $\text{Ag}_3\text{PO}_4$  rhombic dodecahedron; (C) index of a rhombododecahedral crystal model;<sup>1</sup> (D) a structure model of rhombic dodecahedron; (E) crystal model of  $\text{Ag}_3\text{PO}_4$  rhombic dodecahedron (which is cleaved from a  $2 \times 2 \times 2$  super cell)<sup>2</sup>.

\* Corresponding author. Tel and Fax: 86-20-8711 4099, E-mail address: [zhangwd@scut.edu.cn](mailto:zhangwd@scut.edu.cn)

(W. D. Zhang).

## Experimental section

### Materials

AgNO<sub>3</sub>, Na<sub>2</sub>HPO<sub>4</sub>, NH<sub>3</sub>•H<sub>2</sub>O (mass fraction 2%), glycine, triethanolamine, ethylenediamine, sodium oxalate, sodium citrate, EDTA-Na, EtOH and NaAc were purchased from local chemical agents and were of reagent grade without further purification.

### Synthesis of Ag<sub>3</sub>PO<sub>4</sub> sub-micrometer crystals

In this study, silver-based complexes were used as the Ag<sup>+</sup> source for the preparation of Ag<sub>3</sub>PO<sub>4</sub>. Briefly, AgNO<sub>3</sub> (60 mg) was dissolved in 30 mL deionized water, different ligands (as shown in Fig. S2) were added to form a transparent solution under stirring. The Ag<sub>3</sub>PO<sub>4</sub> crystals were prepared using a facile ion exchange reaction by directly mixing the above solutions containing various complexes with Na<sub>2</sub>HPO<sub>4</sub> (0.10 M) by dropwise addition followed by vigorous stirring. After continuous stirring the mixture or maintaining in a certain temperature for 1-10 h, the slightly yellow precipitate was collected, washed with deionized water thoroughly, and dried in air. In particular, a similar process was employed for the synthesis of Ag<sub>3</sub>PO<sub>4</sub> hollow structures by using the sodium oxalate as ligand which can firstly form the octahedral Ag<sub>2</sub>C<sub>2</sub>O<sub>4</sub> microcrystals as precursors. The obtained Ag<sub>2</sub>C<sub>2</sub>O<sub>4</sub> crystals were subsequently used as templates for the fabrication of the corresponding silver hollow structures. In a typical synthesis procedure, the obtained Ag<sub>3</sub>PO<sub>4</sub> precursor crystals were dispersed in water and then 0.10 M Na<sub>2</sub>HPO<sub>4</sub> was

added at room temperature. After aging the mixture at 60-90 °C for 1-10 h in the solution, the resulted precipitate was collected by centrifugation at 4000 rpm and washed with water repeatedly and dried at 70 °C for 12 h.

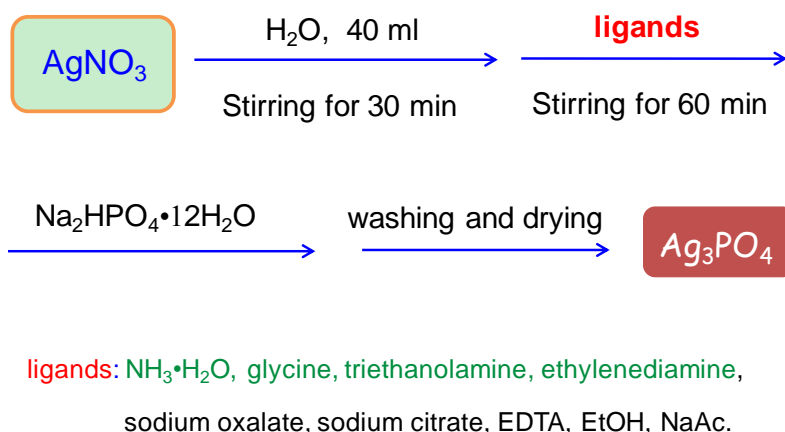

Fig. S2 Schematic illustration of the growth process of the Ag<sub>3</sub>PO<sub>4</sub> crystals with different morphologies by varying the ligands.

### Characterization

The crystal structures and phase compositions of the prepared samples were determined by powder X-ray diffractometer (X'Pert PRO MPD). The particle size and surface morphology of the samples were observed by a scanning electron microscope (SEM, LEO). The UV-vis diffuse reflectance spectra (DRS) were recorded on a UV-vis spectrometer (Hitachi U-3010) by using BaSO<sub>4</sub> as a reference.

### Measurement of photocatalytic activity

Photocatalytic activity of the samples was evaluated by photodegradation of RhB under visible light. A 300 W tungsten halide lamp (Foshan Electric Light Ltd., Foshan,

China) combined with a 420 nm cut-off filter provides visible light irradiation. In a typical photocatalytic experiment, 0.05 g photocatalyst was dispersed in 50 mL RhB solution ( $5.0 \text{ mg L}^{-1}$ ). Prior to light illumination, the suspension was magnetically stirred in dark for 30 min to ensure the adsorption/desorption equilibrium. Then, the solution was exposed to visible light irradiation under magnetic stirring. At given time intervals, 1 mL of the sample was withdrawn after periodical intervals of irradiation, which was centrifuged at 12000 rpm for 6 min, and then analyzed by a Hitachi U-3310 UV-vis spectrophotometer.

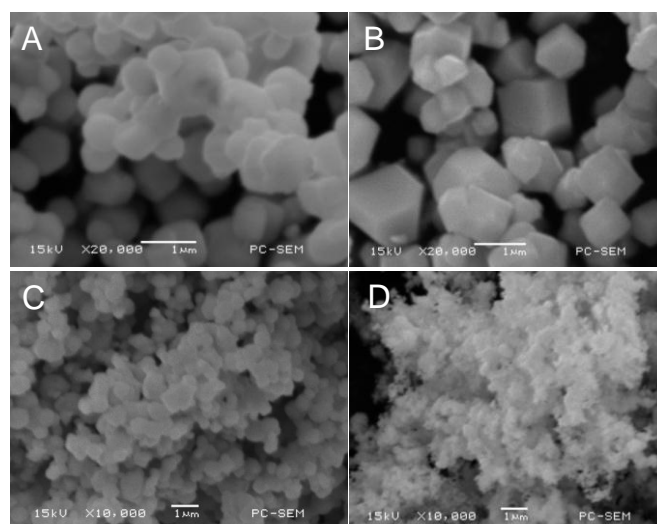

Fig. S3 SEM images of the as-synthesized  $\text{Ag}_3\text{PO}_4$  crystals with different morphologies using different ligands, (A) glycine, (B) ammonia, (C) sodium tartrate, and (D) sodium citrate.

Table S1 Formation constants for silver complexes with various ligands

| ligand              | $\log K_1$ | $\log K_2$ |
|---------------------|------------|------------|
| Ammonia             | 3.24       | 7.05       |
| Glycine             | 3.41       | 6.89       |
| Triethanolamine     | 2.30       | 3.64       |
| 1,10-Phenanthroline | 5.02       | 12.07      |
| Oxalate             | 2.41       | -          |
| Citric acid         | 7.1        | -          |
| EDTA                | 7.32       | -          |

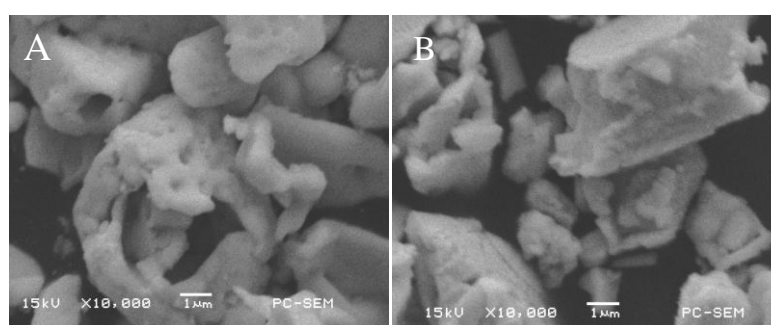

Fig. S4 SEM images of the as-synthesized truncated tetragonal bipyramids  $\text{Ag}_3\text{PO}_4$  microboxes obtained at 70 °C.

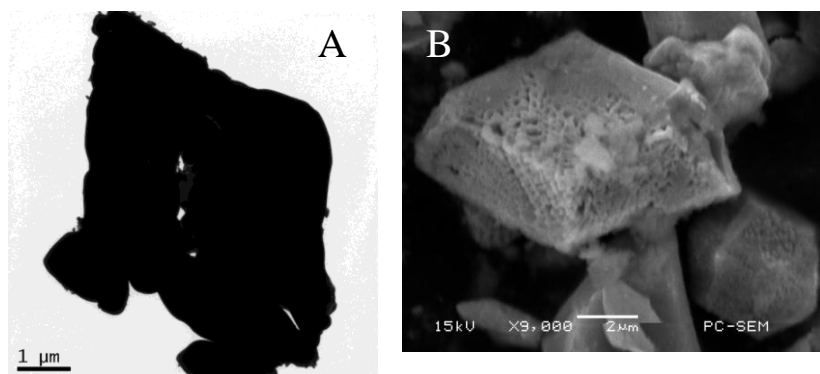

Fig. S5 (A) TEM image of the as-synthesized truncated tetragonal bipyramids  $\text{Ag}_3\text{PO}_4$  microboxes obtained at 80 °C, (B) SEM images of the truncated tetragonal bipyramids  $\text{Ag}_3\text{PO}_4$  microboxes obtained at 90 °C.

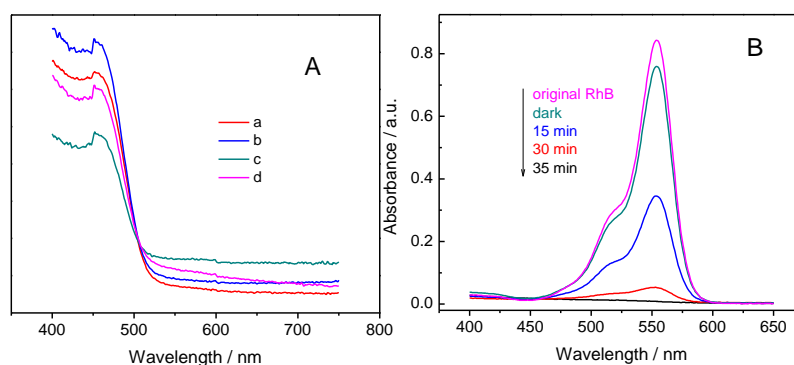

Fig. S6 (A) UV-vis diffuse reflectance spectra of the  $\text{Ag}_3\text{PO}_4$  crystals with different morphologies and (B) photocatalytic activity towards degradation of RhB over sample c. (a) Octahedral  $\text{Ag}_3\text{PO}_4$  microcrystals obtained at 60 °C, (b-d) truncated tetragonal bipyramid microboxes of  $\text{Ag}_3\text{PO}_4$  at pH=9 at temperature of (b) 70 °C, (c) 80 °C and (d) 90 °C.

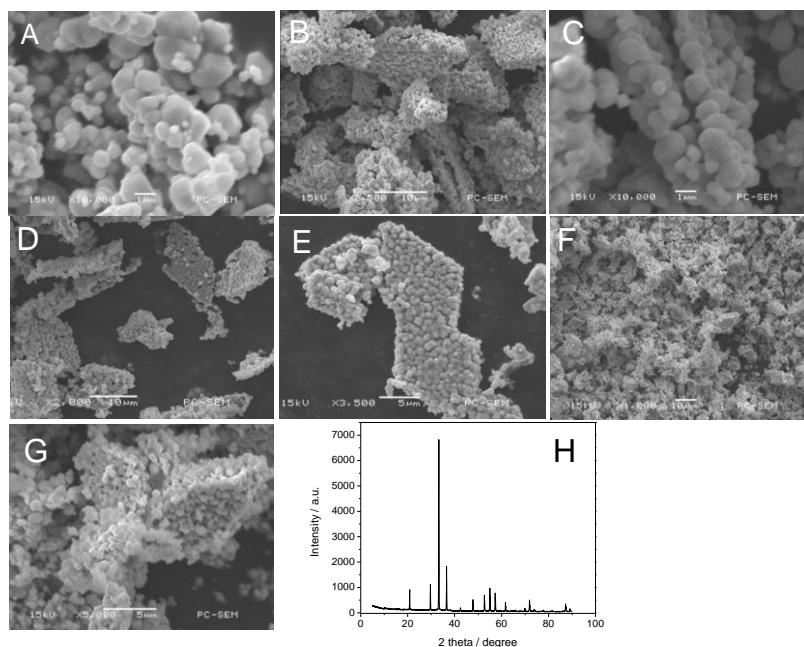

Fig. S7 SEM images of the  $\text{Ag}_3\text{PO}_4$  crystals obtained as a function of aging time at 60 °C, (A) 0 h, (B, C) 3 h, (D, E) 6 h, (F, G) 8 h and XRD pattern of (B).

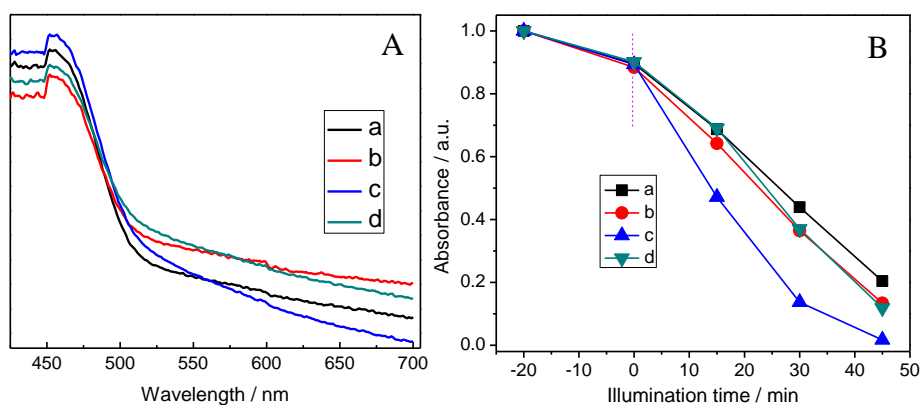

Fig. S8 (A) UV-vis diffuse reflectance spectra and (B) photocatalytic activity of the Ag<sub>3</sub>PO<sub>4</sub> crystals obtained as a function of aging time at 60 °C, (a) 0 h, (b) 3 h, (c) 6 h, (d) 8 h.

## References

- 1 Y. Bi, S. Ouyang, N. Umezawa, J. Cao and J. Ye, *J. Am. Chem. Soc.*, 2011, **133**, 6490.
- 2 J. H. Yang, L. M. Qi, C. H. Lu, J. M. Ma and H. M. Cheng, *Angew. Chem. Int. Ed.*, 2005, **44**, 598.
